# Supplementary material for: Deep neural network trained on gigapixel images improves lymph node metastasis detection in clinical settings
Source: PubMed Central journal article supplement (PMC9187676; doi:10.1038/s41467-022-30746-1), 2022-06-10
Supplement: 41467_2022_30746_MOESM3_ESM.pdf [file 41467_2022_30746_MOESM3_ESM.pdf]

**Title:** Supplementary Video 1

**Description:** Brief introduction to the artificial-intelligence-assisted lymph node assessment workflow trained on gigapixel images.
